# Supplementary material
Source: publisher site journal article supplement (https://www.dovepress.com/article/453564)
Supplement: Supplementary file 1 [file get_supplementary_file.php]

Appendix I

Interview Questions

# Understanding of Burnout:

- What do you know about burnout?
- In your opinion, what factors lead to burnout?

# Experience:

- What is you experience with burnout?

Prompts:

- - What was your personal experience or what did you witness on someone?
  - What made you think it was burnout?

# Impact:

- What are your thoughts about the impact of burnout on someone’s life?

Prompts:

- - How did it affect your professional life?
  - How did it affect your social life?
  - How did it affect your health?

# Relieving and Aggravating Factors:

- In your opinion What relives burnout? What makes burnout worse?

Prompts:

- - How did you deal with burnout? (at work or at home)
  - What made things worse? (at work or at home)

# Barrier and aids to support:

- What are your thoughts about any barriers to seeking support?
- What are your thoughts about aids to seeking support?

Prompts

- - What support did you receive?
  - What type of support were you expecting or needed?
  - What Prevented you from seeking support? Why?
